## CORRESPONDENCE

study,<sup>9</sup> platelet function was altered intraoperatively in the control group, whereas (1) aprotinin preserved spontaneous platelet aggregation and ADP induced platelet aggregation and platelet adhesivity; and (2) postoperative platelet aggregates concentration decreased significantly with aprotinin when compared with placebo. We have not discussed liver transplantation because aprotinin has failed to significantly decrease blood loss in such cases.<sup>10</sup>

That aprotinin can achieve by different mechanisms an identical therapeutic goal in different surgical fields would be puzzling. Consequently, in regard to the mechanism of the blood-sparing effect of aprotinin, it is our opinion that this hypothesis should be revisited.

**Claude Lentschener, M.D.**

Staff Anesthesiologist

**Dan Benhamou, M.D.**

Professor Department of Anesthesiology

Hôpital Antoine-Béclère

Université Paris-Sud

157, rue de la Porte de Trivaux

92141 Clamart Cedex, Paris

France

dBenhamou.beclere@invivo.edu

## References

1. Capdevila X, Calvet Y, Biboulet P, Biron C, Rubenovitch J, d'Athis F: Aprotinin decreases blood loss and homologous transfusion in patients undergoing major orthopedic surgery. *ANESTHESIOLOGY* 1998; 88:50-7
2. van Oeveren W, Harder MP, Roozendaal KJ, Eijssman L, Wildevuur CRH: Aprotinin protects platelets against the initial effect of cardiopulmonary bypass. *J Thorac Cardiovasc Surg* 1990; 99:788-97
3. Wildevuur CRH, Eijssman L, Roozendaal KJ, Harder MP, Chang M, van Oeveren W: Platelet preservation during cardiopulmonary bypass with aprotinin. *Eur J Cardiothorac Surg* 1989; 3:533-8
4. Hill GE, Pohorecki R, Alonso A, Rennard SI, Robbins RA: Aprotinin reduces interleukin-8 production and lung neutrophil accumulation after cardiopulmonary bypass. *Anesth Analg* 1996; 83:696-700
5. Boldt J, Zickmann B, Schindler E, Welters A, Dapper F, Hempelmann G: Influence of aprotinin on the thrombomodulin/protein C system in pediatric cardiac operations. *J Thorac Cardiovasc Surg* 1994; 107:1215-21
6. Lentschener C, Benhamou D, Mercier F, Boyer-Neumann C, Smadja C, Wolf M, Franco D: Aprotinin reduces blood loss in elective liver resection. *Anesth Analg* 1997; 84:875-81
7. Janssens M, Joris J, David JL, Lemaire R, Lamy M: High dose aprotinin reduces blood loss in patients undergoing total hip replacement surgery. *ANESTHESIOLOGY* 1994; 80:23-9
8. Murkin JM, Shannon NA, Bourne RB, Rorabeck CH, Cruickshank M, Wyle G: Aprotinin decreases blood loss in patients undergoing revision or bilateral total hip arthroplasty. *Anesth Analg* 1995; 80:343-8
9. Haas S, Ketterl R, Stemberger A, Wendt P, Fritzsche HM, Kienle H, Lechner F, Blumel G: The effect of aprotinin on platelet function, blood coagulation and blood lactate level in total hip replacement. A double blind clinical trial. *Adv Exp Med Biol* 1984; 167:287-97
10. Garcia-Huete L, Domenech P, Sabate A, Martinez-Brotons F, Jaurieta E, Figueras J: The prophylactic effect of aprotinin on intraoperative bleeding in liver transplantation: A randomized clinical study. *Hepatology* 1997; 26:1143-8

(Accepted for publication July 20, 1998.)

Anesthesiology

1998; 89:1599-600

© 1998 American Society of Anesthesiologists, Inc.

Lippincott Williams & Wilkins

*In Reply:*—I would like to thank Dr. Lentschener and Dr. Benhamou for the attentive reading they have accorded to our article.<sup>1</sup>

Although the mechanisms underlying the beneficial effects of aprotinin on blood loss during surgery were not fully elucidated, reconsidering the hypotheses evoked in the literature involving platelet receptor protection may not be fully justified.

The complex action of aprotinin, a natural serine protease inhibitor, is situated at the cross-section of several reactions triggered during surgery: contact phase activation, tissue factor and tissue plasminogen activator (tpa) release from subendothelial sites, plasmin activation by kallikrein and activated factor XII, as well as the release of kinins and activated C3b fragments.<sup>2-4</sup> Furthermore, aprotinin activation depends on blood aprotinin levels, and as such the administered perioperative dose, whether or not cardiopulmonary bypass (CPB) is used.

Major surgery can activate the extrinsic coagulation pathway by the release of tissue factor from the endothelial cells.<sup>4,5</sup> Aprotinin can limit the onset of disseminated intravascular coagulopathy (DIC) *via* its anti-VIIa activity.<sup>6</sup>

Aprotinin's role in the inhibition of fibrinolysis, reported primar-

ily in works concerning liver surgery,<sup>7,8</sup> is based on the limitation of contact phase activation,<sup>9</sup> direct anti-plasmin activity by inhibition of tpa release,<sup>7,10</sup> and protein C activity.<sup>11</sup> Aprotinin also has been shown to have a local antifibrinolytic effect, limiting perioperative bleeding when injected directly into the pericardial cavity.<sup>12,13</sup> During surgery performed without CPB, this antifibrinolytic effect probably implies aprotinin activity. Both the limited postoperative d-dimer values seen in our patients treated with aprotinin<sup>1</sup> and the greater number of patients in Janssens *et al.*'s<sup>14</sup> control group presenting higher than normal d-dimer values seem to confirm the hypothesis.

It is not improbable that aprotinin's role in limiting bleeding is based on a multimodal mechanism. During surgery with CPB, aprotinin activity seems to primarily involve platelet receptor protection from plasmin activity and contact phase activation.<sup>15</sup> In contrast, a more global action on fibrinolysis and DIC seems to predominate during major surgery without CPB.

In consequence, aprotinin would achieve one therapeutic goal by several different mechanisms of action.



**Xavier Capdevila, M.D., Ph.D.**  
Associate Professor of Anesthesiology  
Lapeyronie University Hospital  
371, Av du Doyen  
Gaston Giraud Montpellier Cedex 5  
Paris 34295, France

## References

1. Capdevila X, Calvet Y, Biboulet PH, Biron C, Rubenovitch J, d'Athis F: Aprotinin decreases blood loss and homologous transfusions in patients undergoing major orthopedic surgery. *ANESTHESIOLOGY* 1998; 88:50-7
2. Royston D: High-dose aprotinin therapy: A review of the first five years' experience. *J Cardiothorac Vasc Anesth* 1992; 6:76-100
3. Hardy JF, Desroches J: Natural and synthetic antifibrinolytics in cardiac surgery. *Can J Anaesth* 1992; 39:353-65
4. Murphy WG, Davies MJ, Eduardo A: The haemostatic response to surgery and trauma. *Br J Anaesth* 1993; 70:205-13
5. Harke H, Rahman S: Haemostatic disorders in massive transfusion. *Bibl Haematol* 1980; 46:179-88
6. Chabbat J, Porte P, Tellier M, Steinbuch M: Aprotinin is a competitive inhibitor of the factor VIIa-tissue factor complex. *Thromb Res* 1993; 71:205-15
7. Segal HC, Hunt BJ, Cottam S, Downing A, Beard C, Francis JL, Potter D, Tan KC: Fibrinolytic activity during orthotopic liver transplantation with and without aprotinin. *Transplantation* 1994; 58:1356-60
8. Lentschener C, Benhamou D, Mercier F, Boyer-Neumann C, Smadja C, Wolf M, Franco D: Aprotinin reduces blood loss in elective liver resection. *Anesth Analg* 1997; 84:875-81
9. Laurel MT, Ratnoff OD, Everson B: Inhibition of the activation of Hageman factor (factor XII) by aprotinin (Trasyol). *J Lab Clin Med* 1992; 119:580-5
10. Hunt BJ, Cottam S, Segal H, Ginsburg R, Potter D: Inhibition by aprotinin of tPA-mediated fibrinolysis during orthotopic liver transplantation (letter). *Lancet* 1990; 336(8711):381
11. Espana F, Estelles A, Griffin JH, Aznar J, Gilabert J: Aprotinin (trasyol) is a competitive inhibitor of activated protein C. *Thromb Res* 1989; 56:751-6
12. Tatar H, Cicek S, Demirkilic U, Ozal E, Suer H, Ozturk O, Isiklar H: Topical use of aprotinin in open heart operations. *Ann Thorac Surg* 1993; 55:659-61
13. O'Regan DJ, Giannopoulos N, Mediratta N, Kendall SW, Forni A, Pilai R, Westaby S: Topical aprotinin in cardiac operations. *Ann Thorac Surg* 1995; 60:1155
14. Janssens M, Joris J, Davis JL, Lemaire R, Lamy M: High-dose aprotinin reduces blood loss in patients undergoing total hip replacement surgery. *ANESTHESIOLOGY* 1994; 80:23-9
15. Wachtfogel YT, Harpel PC, Edmunds LH Jr, Colman RW: Formation of C1s-inhibitor, kallikrein-C&-inhibitor and plasma-alpha2-plamins-inhibitor complexes during cardiopulmonary bypass. *Blood* 1989; 73:468-71

(Accepted for publication July 20, 1998.)

Anesthesiology  
1998; 89:1600  
© 1998 American Society of Anesthesiologists, Inc.  
Lippincott Williams & Wilkins

## Perfuse or Precondition?

*To the Editor:*—We read with interest the case report about coronary revascularization without cardiopulmonary bypass. In the article, the authors discuss ischemic preconditioning to prepare the myocardium for a 5- to 15-min period of coronary occlusion. The authors cite, "brief periods of occlusion have been shown to paradoxically protect or precondition the heart and to reduce the infarct size caused by a subsequent period of coronary artery occlusion."<sup>1</sup> The key point is that in undertaking an operation to protect or save myocardium, this procedure already acknowledges that one is going to kill some off—but only a little.

Our question is why precondition? Why not perfuse? In a case report published in another journal, we described the use of a perfusion cannula connected from the side port of a femoral artery DLP cannula.<sup>2</sup> The perfusion cannula is inserted into the coronary artery under direct visualization. This allows oxygenated arterial blood to perfuse the myocardium during the period of anastomosis. This is similar in function to a shunt used during a carotid endarterectomy. It is not necessary to use a femoral perfusion cannula to make this system work; many innovative sites, catheters, and tubing can be used. The key here is the concept of maintaining perfusion to the myocardium during the period of anastomosis to prevent infarction. Minimally invasive cardiac

surgery that avoids the use of cardiopulmonary bypass is an important new procedure that will only increase in popularity as new technologies and techniques continue to make it safer and more effective.

**Michael F. Borges, M.D.**  
Staff Anesthesiologist  
**Alan S. Coulson, M.D.**  
Director of Heart Institute  
Staff Cardiovascular and Vascular Surgeon  
Dameron Hospital  
Stockton, California  
dmrnborges@concentric.net

## References

1. Lawson CS: Preconditioning in man: Progress and prospects. *J Mol Cell Cardiol* 1995; 27:961-7
2. Borges MF, Spohn PK, Coulson AS: Arrhythmia/ischemia management during minimally invasive cardiac operation. *Ann Thorac Surg* 1997; 64:843-4

(Accepted for publication July 30, 1998.)
